# Supplementary material
Source: MDPI journal article supplement (https://www.mdpi.com/2311-7524/8/5/379)
Supplement: s1 [file s1]

## Supplemental File

# **Auxin Responsive Gene, PpSAUR43, is Involved in the Ripening and Softening of Peach Fruit**

**Jiahui Wang, Weijing Su, Kun Liu, Ze Xu, Kamran Shah, Juanjuan Ma, Dong Zhang, Yanan Hu \* and Caiping Zhao \***

College of Horticulture, Northwest A&F University, Yangling, Shaanxi 712100, China;  
wangjiahui97@nwfau.edu.cn (J. W.); swj10162021@163.com (W. S.); 1032768290@qq.com (K. L.);  
xuzejizi@163.com (Z. X.); kamranshah801@nwfau.edu.cn (K. S.); 475084553@qq.com (J. M.);  
afant@nwsuaf.edu.cn (D. Z.)

\* Correspondence: huyn\_nwsuaf@163.com (Y. H.); zhcc@nwsuaf.edu.cn (C. Z)

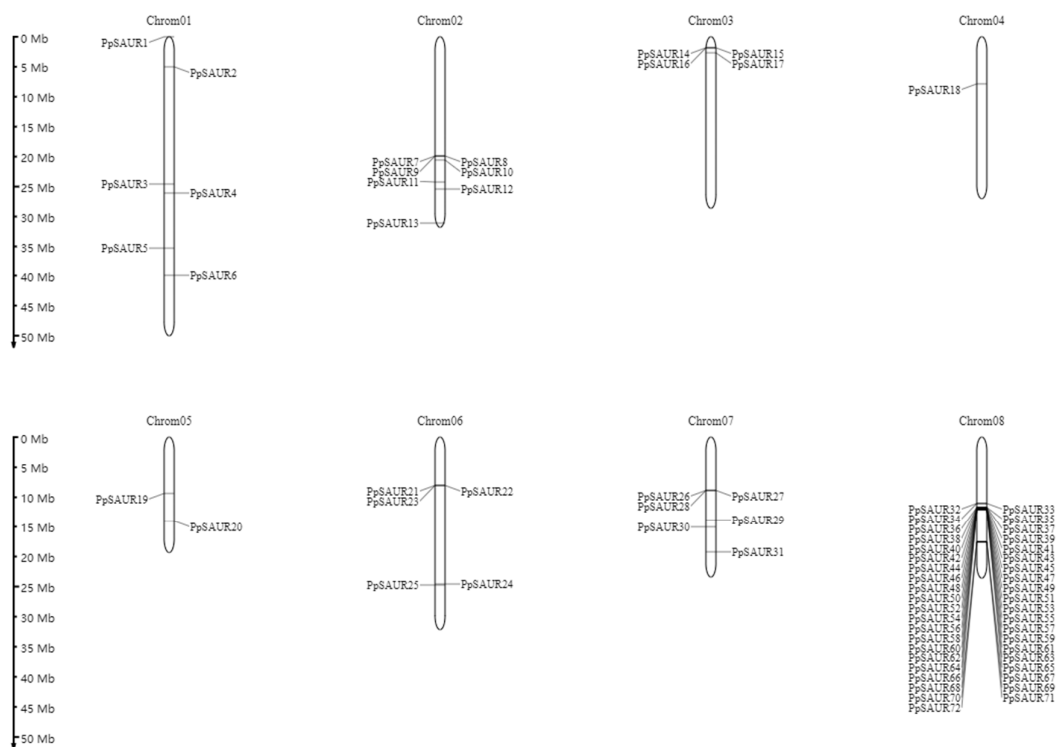

**Figure S1.** Chromosomal localization of SAUR family members.

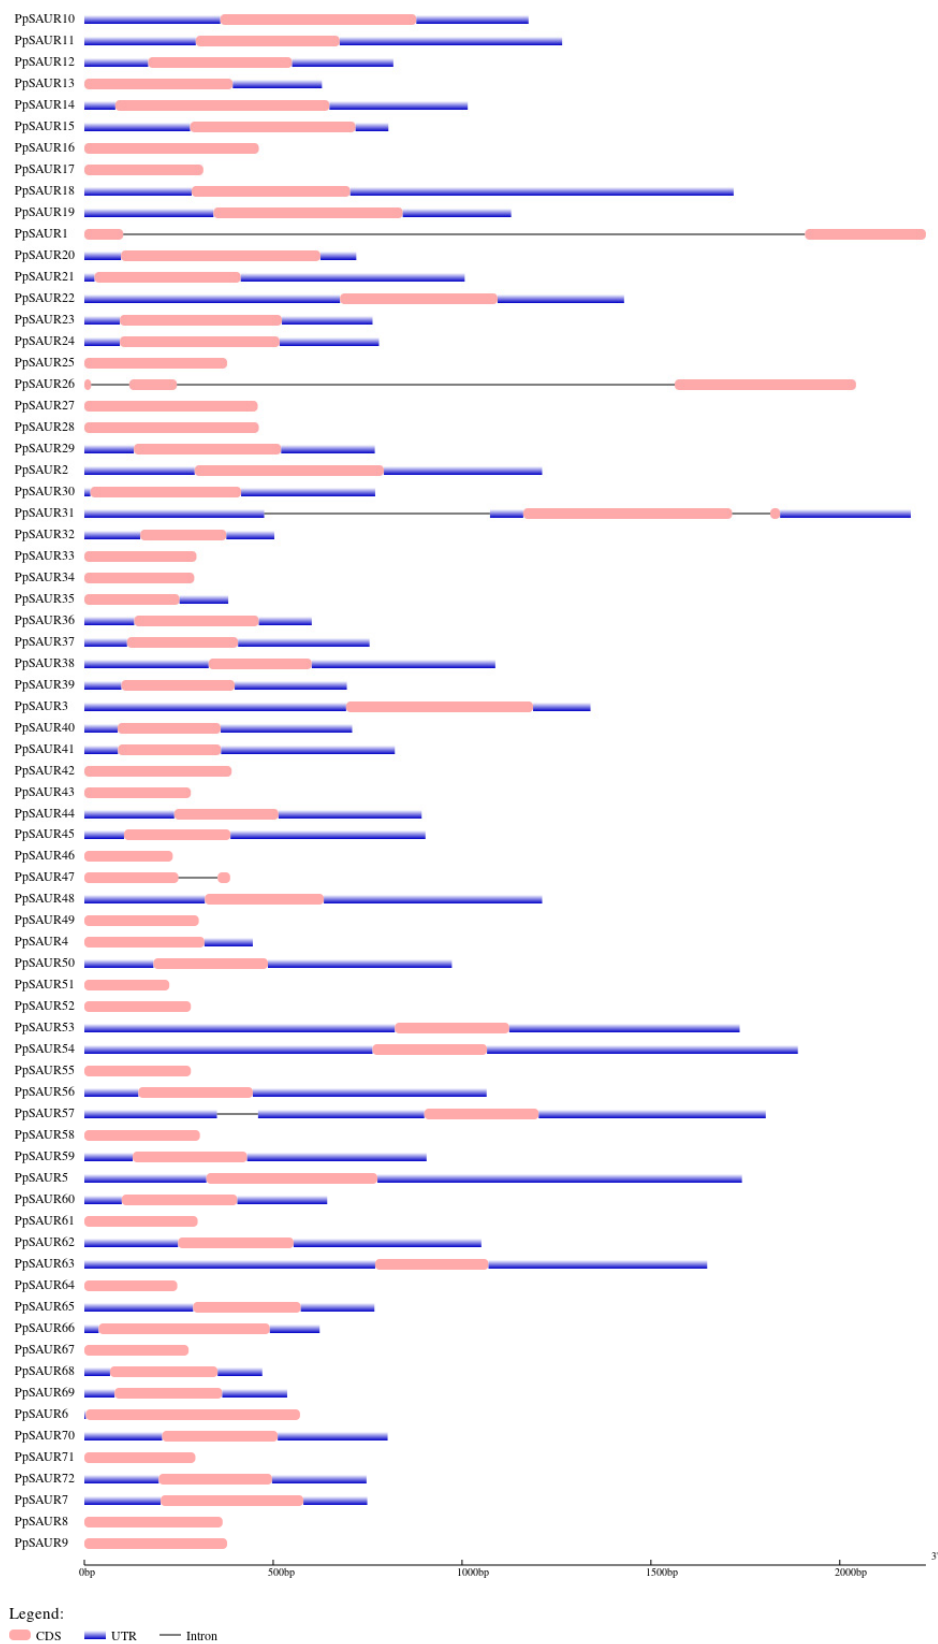

**Figure S2.** Gene structure of SAUR family members.

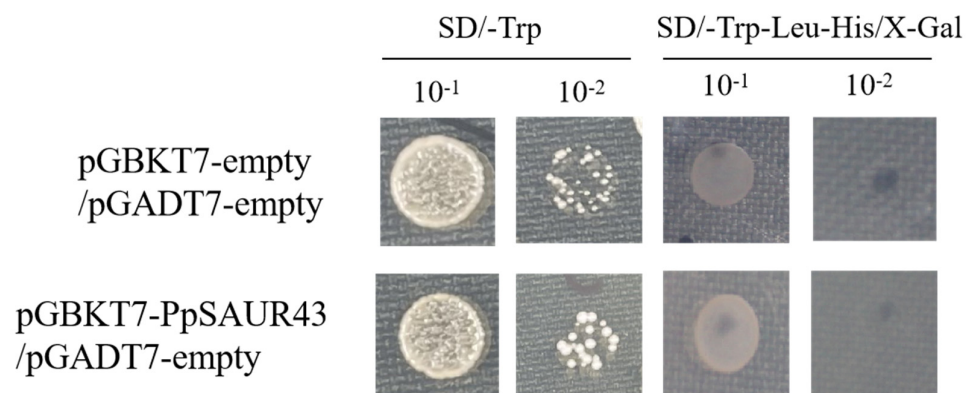

**Figure S3.** Transcriptional activation identification of the full length of PpSAUR43.

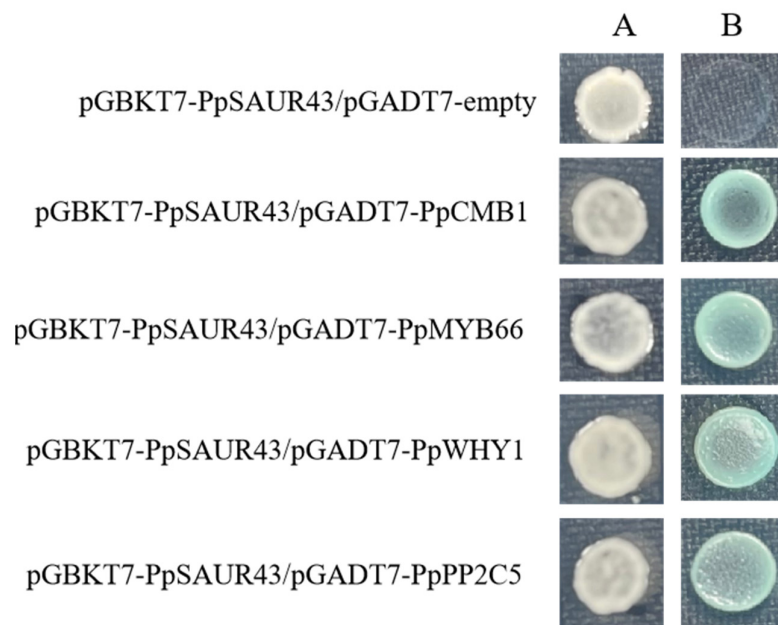

**Figure S4.** The interacting confirmation between PpSAUR43 and PpCMB1, PpMY66, PpWHY1 and PpPP2C5 in yeast two-hybrid system.

A. SD/-Trp/-Leu; B.SD/-Ade/-His/-Leu/-Trp/X- $\alpha$ -gal.

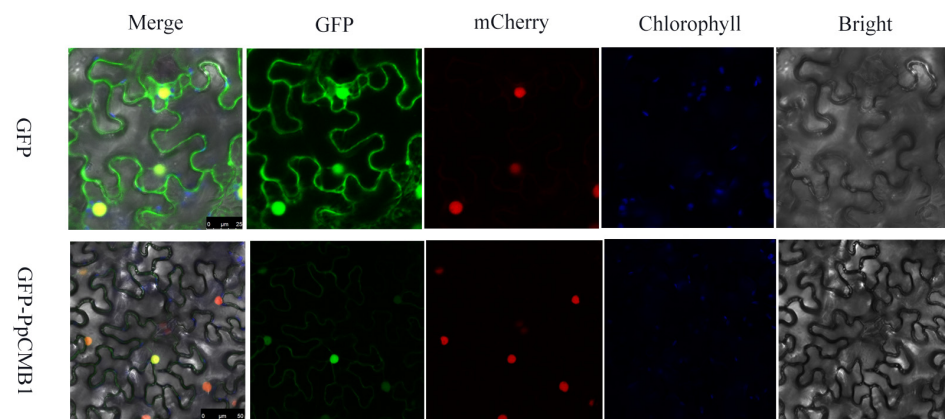

**Figure S5.** Subcellular localization of GFP constructs of PpCMB1 proteins.

**Table S1.** Primers for cloning and RT-qPCR in this study

| Genes                                                             | Primer | Sequence (5'-3')                              |                             |
|-------------------------------------------------------------------|--------|-----------------------------------------------|-----------------------------|
| <b>Overexpression and subcellular localization analysis</b>       |        |                                               |                             |
| <i>PpSAUR43</i>                                                   | PF     | ACGAGCTCGGTACCATGGGGTTCCGGTTGCCAG             |                             |
|                                                                   | PR     | CATGGTGTCTGACTCTAGATACACGTAAACGGGAAGTGAGATC   |                             |
| <b>Subcellular localization analysis</b>                          |        |                                               |                             |
| <i>PpCMB1</i>                                                     | PF     | ACGAGCTCGGTACCATGGGAAGAGGTAGAGTTGAGCT         |                             |
|                                                                   | PR     | CATGGTGTCTGACTCTAGAAAGCATCCACCCAGGAATGAATC    |                             |
| <b>Bimolecular fluorescence complementation (BIFC)</b>            |        |                                               |                             |
| <i>PpSAUR43</i>                                                   | PF     | GGGACTCTAGAGGATCTCGAGATGGGGTTCCGGTTGCCAG      |                             |
|                                                                   | PR     | ATCGTATGGGTACATGGTACCTACACGTAAACGGGAAGTGAGATC |                             |
| <i>PpCMB1</i>                                                     | PF     | TCCGTCGACCTCGAGGGTACCATGGGAAGAGGTAGAGTTGAGCT  |                             |
|                                                                   | PR     | CTCCTACCCGGGAGCGGTACCAAGCATCCACCCAGGAATGAATC  |                             |
| <b>Yeast two-hybrid assay (Y2H)</b>                               |        |                                               |                             |
| <i>PpSAUR43</i>                                                   | PF     | ATGGCCATGGAGGCCGAATTCATGGGGTTCCGGTTGCCAG      |                             |
|                                                                   | PR     | CCGCTGCAGGTCGACGGATCCTACACGTAAACGGGAAGTGAGATC |                             |
| <i>PpCMB1</i>                                                     | PF     | GGAGGCCAGTGAATTCATGGGAAGAGGTAGAGTTGAGCT       |                             |
|                                                                   | PR     | CGAGCTCGATGGATCCAAGCATCCACCCAGGAATGAATC       |                             |
| <b>Quantitative real-time polymerase chain reaction (RT-qPCR)</b> |        |                                               | <b>Amplicon Length (bp)</b> |
| <i>PpSAUR43</i>                                                   | PF     | GCAGTGTATGTTGGGGAGAGCCAG                      | 134                         |
|                                                                   | PR     | GTCTTCACTGCAGGGGATGGTG                        |                             |
| <i>PpCMB1</i>                                                     | PF     | GAGGAGGAAGCTGGAAGAAAC                         | 107                         |
|                                                                   | PR     | GGCTTGAGGGTCGGCATAGTTTAC                      |                             |
| <i>PpACO1</i>                                                     | PF     | TGATGGCACCAGAATGTCAATAGC                      | 183                         |
|                                                                   | PR     | CCACTGCTTTCATGGCTTCAAATC                      |                             |
| <i>PpPG</i>                                                       | PF     | AACCAGATGGCAAGACTGACTCAA                      | 140                         |
|                                                                   | PR     | AGCAATCCACTCACCACAATGTTG                      |                             |
| <i>PpACS1</i>                                                     | PF     | GCAACTTCCACAGTCTCGTCATCC                      | 158                         |
|                                                                   | PR     | GGATGAGGAGCAATAGCAAGGC                        |                             |
| <i>PpILR1</i>                                                     | PF     | TCTTCCAATAGGAGCAGCACT                         | 180                         |
|                                                                   | PR     | CATTTGTGCTTTAGTAAGACGG                        |                             |
| <i>PpPIN1</i>                                                     | PF     | ATGATGGCGGCTGGGAGGAACT                        | 147                         |
|                                                                   | PR     | TTGCTGGCCGCCGTGGTAAA                          |                             |
| <i>PpGH3.1</i>                                                    | PF     | AAGAGCGGCACGTTTGAGGAGTT                       | 91                          |
|                                                                   | PR     | CAATGCGGTAAAGATGGGCTAAAA                      |                             |
| <i>PpTUA</i>                                                      | PF     | TTCTCTCTACTCATTCCCTCCTTG                      | 100                         |
|                                                                   | PR     | GATTGGTGTATGTTGGT CTCTCG                      |                             |

PF= Primer forward, PR= Primer reverse.

Accession numbers: The sequence involved in this article can be found in the Genome Database for Rosaceae (GDR, <http://www.rosaceae.org>). And the sequence accession numbers are as follows: *PpSAUR43* (Prupe.8G079500); *PpCMB1* (Prupe.5G208400); *PpACO1* (Prupe.3G20990); *PpPG* (Prupe.6G202500); *PpACS1* (Prupe.2G176900); *PpILR1* (Prupe.7G100000); *PpPIN1* (Prupe.5G233100); *PpGH3.1* (Prupe.8G137900); *PpTUA* (Prupe.6G004100).

**Table S2.** Result of partial candidate positive clones by yeast two-hybrid (Y2H) library assay in peach

| <b>Accession</b> | <b>Encoding protein</b>                       | <b>Function classification</b>                                                                           |
|------------------|-----------------------------------------------|----------------------------------------------------------------------------------------------------------|
| XM_020568055.1   | FT-interacting protein 1                      | An essential regulator required for FT protein transport                                                 |
| XM_007223496.2   | early nodulin-like protein 1                  | Electron carrier activity, binding of copper ions, associated with anthocyanin synthesis, drought stress |
| XM_007209877.2   | protein ASPARTIC PROTEASE IN GUARD CELL 1     | Seed dormancy                                                                                            |
| XM_007208651.2   | U-box domain-containing protein 33            | Drought stress                                                                                           |
| XM_007212858.2   | probable transcription repressor OFP9         | Transcription                                                                                            |
| XM_007209443.2   | MADS-box protein CMB1                         | Transcription                                                                                            |
| XM_020568009.1   | sucrose synthase                              | Sucrose synthesis                                                                                        |
| XM_007209944.2   | transcription factor WER                      | Transcription                                                                                            |
| XM_007222413.2   | single-stranded DNA-binding protein WHY1      | Plant leaf senescence                                                                                    |
| XM_007208244.2   | ETHYLENE INSENSITIVE 3-like 3 protein         | Transcription factors in the ethylene signaling                                                          |
| XM_007201010.2   | probable protein phosphatase 2C 60            | Posttranslational modification                                                                           |
| XM_007205078.2   | E3 ubiquitin-protein ligase Haka              | Posttranslational modification, protein turnover, chaperones                                             |
| XM_020558191.1   | E3 ubiquitin-protein ligase UPL2              | Posttranslational modification, protein turnover, chaperones                                             |
| XM_007204998.2   | probable protein phosphatase 2C 6             | Posttranslational modification                                                                           |
| XM_007201478.2   | phytochrome A-associated F-box protein        | Signal transduction mechanisms                                                                           |
| XM_020562584.1   | NAC domain-containing protein 72              | Transcription                                                                                            |
| XM_007201725.2   | F-box protein SKP2A                           | Regulates the proteolysis of cell cycle transcription factors                                            |
| XM_007220940.2   | zinc finger CCCH domain-containing protein 11 | Transcription                                                                                            |
| XM_034366039.1   | probable protein phosphatase 2C 5             | Posttranslational modification                                                                           |
| XM_007225246.2   | linoleate 9S-lipoxygenase 5                   | Function unknown                                                                                         |
| XM_007226905.2   | auxin efflux carrier component 3              | Auxin transport                                                                                          |
| XM_007213751.2   | Anthocyanidin reductase                       | Anthocyanin synthesis                                                                                    |
| XM_020561985.1   | probable WRKY transcription factor 31         | Transcription                                                                                            |



**Table S3.** Cis-acting regulatory elements were predicted in the promoter regions of *PpSAUR43*, *PpCAMB1* related to fruit development and ripening in peach.

| Genes           | cis-element                     | Sequence                                    | Probable function                                                 |
|-----------------|---------------------------------|---------------------------------------------|-------------------------------------------------------------------|
| <i>PpCAMB1</i>  | ERE                             | ATTTTAAA                                    | ethylene responsive element                                       |
|                 | AuxRR-core                      | GGTCCAT                                     | cis-acting regulatory element involved in auxin responsiveness    |
|                 | TGA-element                     | AACGAC                                      | auxin-responsive element                                          |
|                 | ABRE                            | ACGTG<br>CACGTG<br>CGCACGTGTC               | abscisic acid-responsive element                                  |
|                 | CCAAT-box                       | CAACGG                                      | MYBHv1 binding site                                               |
|                 | G-Box                           | CACGTG<br>CACGTT<br>ACACGTGT<br>CAGACGTGGCA | cis-acting regulatory element involved in light responsiveness    |
|                 | TGACG-motif<br>CGTCA-motif      | TGACG<br>CGTCA                              | cis-acting regulatory element involved in the MeJA-responsiveness |
|                 | GARE-motif<br>P-Box<br>TATC-box | TCTGTTG<br>CCTTTTG<br>TATCCCA               | gibberellin-responsive element                                    |
|                 | TCA-element                     | CCATCTTTTT                                  | cis-acting element involved in salicylic acid responsiveness      |
|                 |                                 |                                             |                                                                   |
| <i>PpSAUR43</i> | AuxRR-core                      | GGTCCAT                                     | cis-acting regulatory element involved in auxin responsiveness    |
|                 | ERE                             | ATTCATA                                     | ethylene responsive element                                       |
|                 | G-box                           | TACGTG                                      | cis-acting regulatory element involved in light responsiveness    |
